# Supplementary material for: Lineage-specific SNPs for genotyping of Mycobacterium tuberculosis clinical isolates
Source: PubMed Central journal article supplement (PMC5431204; doi:10.1038/s41598-017-01580-z), 2017-05-03

## Lineage-specific SNPs for genotyping of *Mycobacterium tuberculosis* clinical isolates

Horng-Yunn Dou<sup>4a#</sup>, Chien-Hsing Lin<sup>1a</sup>, Yih-Yuan Chen<sup>6</sup>, Shiu-Ju Yang<sup>4</sup>, Jia-Ru Chang<sup>4</sup>, Keh-Ming Wu<sup>1,2</sup>, Ying-Tsong Chen<sup>1,3</sup>, Pei-Ju Chin<sup>1,2</sup>, Yen-Ming Liu<sup>1</sup>, Ih-Jen Su<sup>4</sup>, Shih-Feng Tsai<sup>1,2,5#</sup>

<sup>1</sup>Institute of Molecular and Genomic Medicine, National Health Research Institutes, Zhunan, Miaoli, Taiwan

<sup>2</sup>Genome Research Center, National Yang-Ming University, Taipei, Taiwan

<sup>3</sup>Institute of Bioinformatics, National Chung Hsing University, Taichung, Taiwan

<sup>4</sup>Institute of Infectious Diseases and Vaccinology, National Health Research Institutes, Zhunan, Miaoli, Taiwan

<sup>5</sup>Institute of Biomedical Informatics, National Yang-Ming University, Taipei, Taiwan

<sup>6</sup>Department of Biochemical Science and Technology, National Chiayi University, Chia-Yi, Taiwan

<sup>a</sup> Co-first authors

<sup>#</sup> Corresponding authors

Horng-Yunn Dou, PhD

Institute of Infectious Diseases and Vaccinology, National Health Research Institutes, Zhunan, Miaoli County 350, Taiwan

Tel: +886-37-246 166, Extension: 35529

Fax: +886-37-586457

E-mail: [hydou@nhri.org.tw](mailto:hydou@nhri.org.tw)

Shih-Feng Tsai, MD, PhD

Division of Molecular and Genomic Medicine, National Health Research Institutes, Zhunan, Miaoli County 350, Taiwan

Fax: +886-37-586459

Tel: +886-37-246166, Extension: 35310

E-mail: [petsai@nhri.org.tw](mailto:petsai@nhri.org.tw)

## Supplementary Tables

Supplementary Table S1. Genome sequencing and mapping results of the six MTB strains

| Strain                          | by 454 GS-20   |              |              | by 454 GS-FLX |              |                 |
|---------------------------------|----------------|--------------|--------------|---------------|--------------|-----------------|
|                                 | W6             | M3           | M7           | A27           | A18          | M24             |
| Genogroup                       | modern-Beijing | Haarlem      | LAM          | T1            | EAI          | ancient-Beijing |
| totalReads                      | 899,895        | 1,031,636    | 633,450      | 402,374       | 308,213      | 539,007         |
| totalBases                      | 82,327,348     | 102,358,252  | 61,414,854   | 89,801,813    | 69,425,047   | 124,997,399     |
| averageLength                   | 91             | 99           | 97           | 223           | 225          | 232             |
| <b>depth (X)<sup>§</sup></b>    | <b>18.66</b>   | <b>23.20</b> | <b>13.92</b> | <b>20.36</b>  | <b>15.74</b> | <b>28.33</b>    |
| mappedReads                     | 846,966        | 1,008,774    | 605,942      | 398,267       | 304,958      | 534,763         |
| mappedBases                     | 78,871,442     | 100,531,219  | 59,595,662   | 88,888,588    | 68,313,195   | 123,615,730     |
| mappedRate (%)                  | 95.80%         | 98.22%       | 97.04%       | 98.98%        | 98.40%       | 98.89%          |
| <b>totalContigs</b>             | <b>214</b>     | <b>267</b>   | <b>305</b>   | <b>290</b>    | <b>290</b>   | <b>299</b>      |
| totalContigLength               | 4,301,167      | 4,312,708    | 4,305,621    | 4,286,613     | 4,277,247    | 4,256,888       |
| coverage (%)                    | 98.19%         | 98.09%       | 97.98%       | 97.56%        | 97.40%       | 97.43%          |
| <b>largeContigs<sup>*</sup></b> | <b>134</b>     | <b>147</b>   | <b>158</b>   | <b>200</b>    | <b>196</b>   | <b>196</b>      |
| largeContigLength               | 4,271,545      | 4,271,928    | 4,259,176    | 4,254,158     | 4,242,400    | 4,224,733       |
| avgContigSize                   | 31,877         | 29,061       | 26,957       | 21,271        | 21,645       | 21,555          |
| N50ContigSize                   | 64,025         | 43,790       | 52,882       | 37,667        | 37,913       | 39,642          |
| largestContig                   | 161,689        | 132,141      | 151,052      | 151,199       | 101,590      | 129,955         |
| Q40Bases (%)                    | 99.75%         | 99.95%       | 99.59%       | 99.54%        | 99.48%       | 99.68%          |

<sup>§</sup>depth = totalBases / length of H37Rv genome

<sup>\*</sup> largeContig: contig length >= 1000 bp

avgContigSize & N50ContigSize are calculated from largeContigs

Mapped by 454 gsMapper Release: 2.3

Supplementary Table S2. High-confidence SNPs with total depth  $\geq 3$  and variation rate  $\geq 80\%$  for each site of each strain

| Comparing to the reference | # of SNPs | M3  | W6    | M7  | A18   | A27 | M24   |
|----------------------------|-----------|-----|-------|-----|-------|-----|-------|
| Differences in 1 strain    | 2,376     | 133 | 270   | 317 | 1,260 | 136 | 260   |
| Differences in 2 strains   | 538       | 205 | 325   | 2   | 9     | 206 | 329   |
| Differences in 3 strains   | 232       | 3   | 228   | 4   | 229   | 3   | 229   |
| Differences in 4 strains   | 19        | 6   | 19    | 16  | 14    | 3   | 18    |
| Differences in 5 strains   | 13        | 13  | 12    | 8   | 12    | 9   | 11    |
| Differences in 6 strains   | 404       | 404 | 404   | 404 | 404   | 404 | 404   |
| Sum                        | 3,582     | 764 | 1,258 | 751 | 1,928 | 761 | 1,251 |

Supplementary Table S3. Numbers of strain-specific SNPs used in the genotyping panel in the Sequenom MassArray analysis

| Gene family | Substitution   | Isolate (lineage)        |                        |              |             |                 |            | Sum |
|-------------|----------------|--------------------------|------------------------|--------------|-------------|-----------------|------------|-----|
|             |                | M24 (ancient<br>Beijing) | W6 (modern<br>Beijing) | A18<br>(EAI) | M7<br>(LAM) | M3<br>(Haarlem) | A27<br>(T) |     |
| PE/PPE      | synonymous     | 5                        | 1                      | 5            | 4           | 3               | 2          | 60  |
|             | non-synonymous | 10                       | 6                      | 16           | 3           | 3               | 2          |     |
| non-PE/PPE  | non-synonymous | 10                       | 10                     | 10           | 10          | 10              | 10         | 60  |
| <b>Sum</b>  |                | 25                       | 17                     | 31           | 17          | 16              | 14         | 120 |

Supplementary Table S4. SNP discovery in Haarlem and T subtypes of the Euro-American lineage

| Data source | Isolate | Lineage        | Sublineage     | Total # of SNPs | PE/PPE gene family |                | non-PE/PPE gene family |                | Intergenic SNPs |     |
|-------------|---------|----------------|----------------|-----------------|--------------------|----------------|------------------------|----------------|-----------------|-----|
|             |         |                |                |                 | synonymous SNPs    | non-synonymous | synonymous SNPs        | non-synonymous |                 |     |
| HiSeq2000   | A005    | <i>Haarlem</i> | h3(st227)      | 2261            | 126                | 206            | 646                    | 1053           | 230             |     |
|             | D065    | <i>Haarlem</i> | h3(st742)      | 984             | 76                 | 75             | 308                    | 438            | 87              |     |
|             | A073    | <i>Haarlem</i> | h3(st742)      | 1651            | 107                | 154            | 460                    | 744            | 186             |     |
|             | B042    | <i>Haarlem</i> | st36           | 1645            | 106                | 153            | 449                    | 753            | 184             |     |
|             | C015    | <i>Haarlem</i> | h3(st50)       | 1579            | 114                | 113            | 451                    | 719            | 182             |     |
|             | W70     | <i>Haarlem</i> | h3(st50)       | 1009            | 65                 | 71             | 351                    | 435            | 87              |     |
|             | A074    | <i>T</i>       | T1(st102)      | 1615            | 127                | 148            | 450                    | 721            | 169             |     |
|             | B010    | <i>T</i>       | T2-T3(st73)    | 1638            | 106                | 154            | 457                    | 739            | 182             |     |
|             | B029    | <i>T</i>       | T2 (st52)      | 1590            | 117                | 160            | 426                    | 730            | 157             |     |
|             | W21     | <i>T</i>       | T1,st53        | 896             | 69                 | 81             | 257                    | 397            | 92              |     |
|             | KVGH295 | <i>T</i>       | T1 like        | 1039            | 59                 | 91             | 318                    | 460            | 111             |     |
|             | KVGH458 | <i>T</i>       | T3 like        | 958             | 78                 | 84             | 286                    | 421            | 89              |     |
|             | 454     | M3             | <i>Haarlem</i> | h3(st742)       | 813                | 41             | 49                     | 276            | 399             | 48  |
|             |         | A27            | <i>T</i>       | T1,st53         | 865                | 40             | 41                     | 277            | 405             | 102 |

## Supplementary Figures

Supplementary Figure S1. High genetic diversity within the Euro-American lineage. (A) Phylogenetic analysis of Euro-American strains using 4,419 whole-genome SNP markers. The phylogenetic tree was constructed based on Nei's distance using the PHYLIP software (neighbor-joining approach). (B) Principal component analysis (PCA) of Euro-American strains. The genotype data of 4,419 whole-genome SNPs was transformed into numeric values, and then the PCA method was applied to analyze these 14 clinical Euro-American isolates and the H37Rv reference strain using SAS program.

(A)

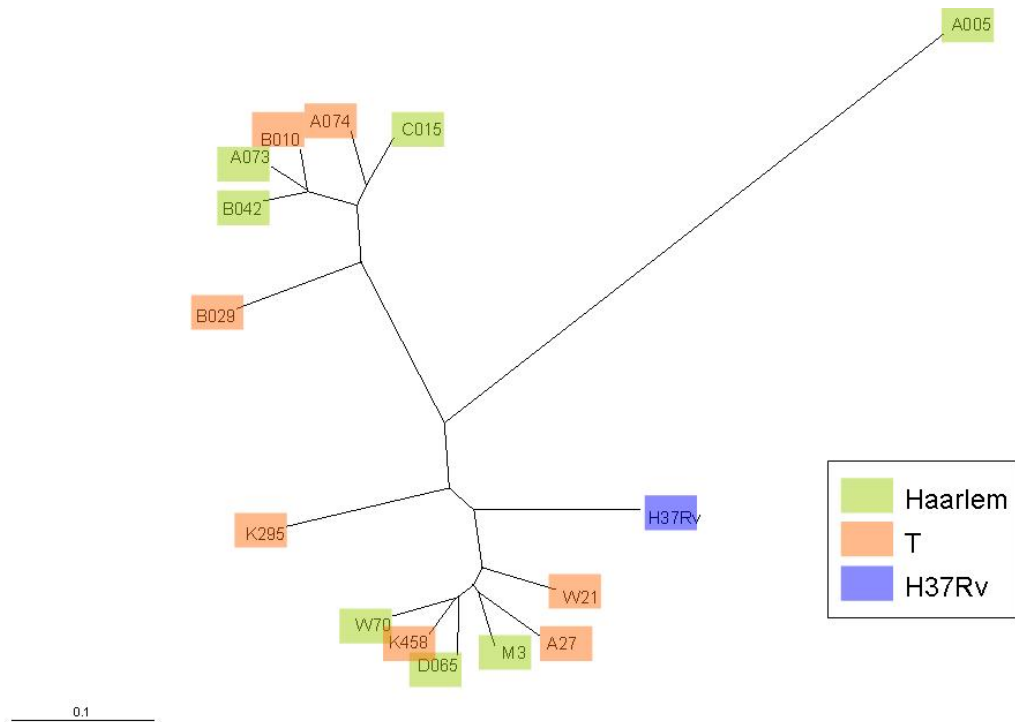

(B)

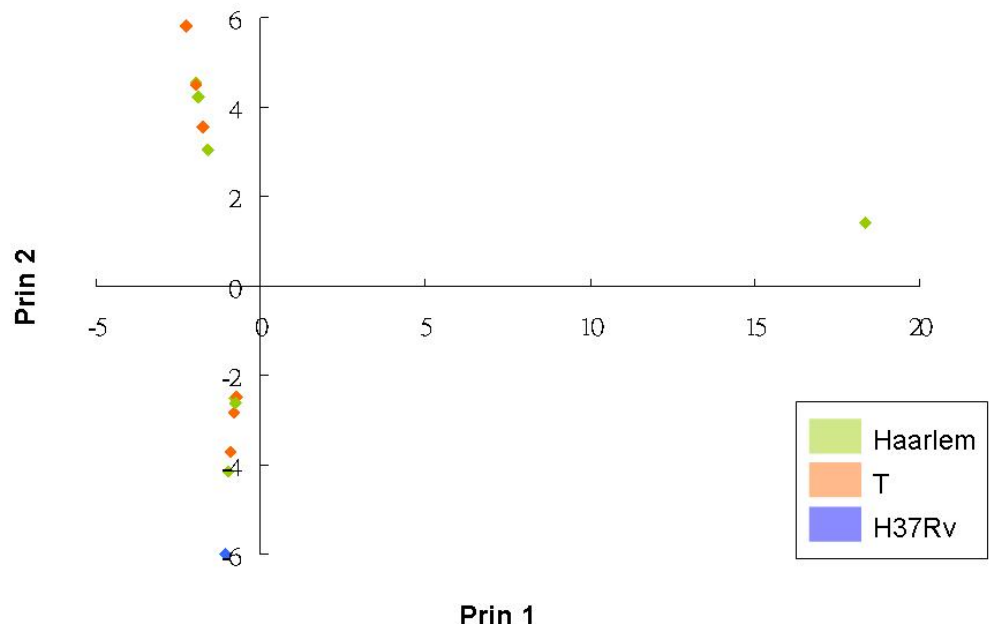

Supplementary Figure S2. A minimum spanning tree based on 24-MIRU-VNTR genotyping of 156 *Mycobacterium tuberculosis* isolates. The circles represent different types classified by 24-MIRU-VNTR genotyping and were color-coded according to their spoligotype classification. The sizes of the circles represent the number of isolates sharing the same genotype. (The star symbols indicate strain misclassification by spoligotyping.)

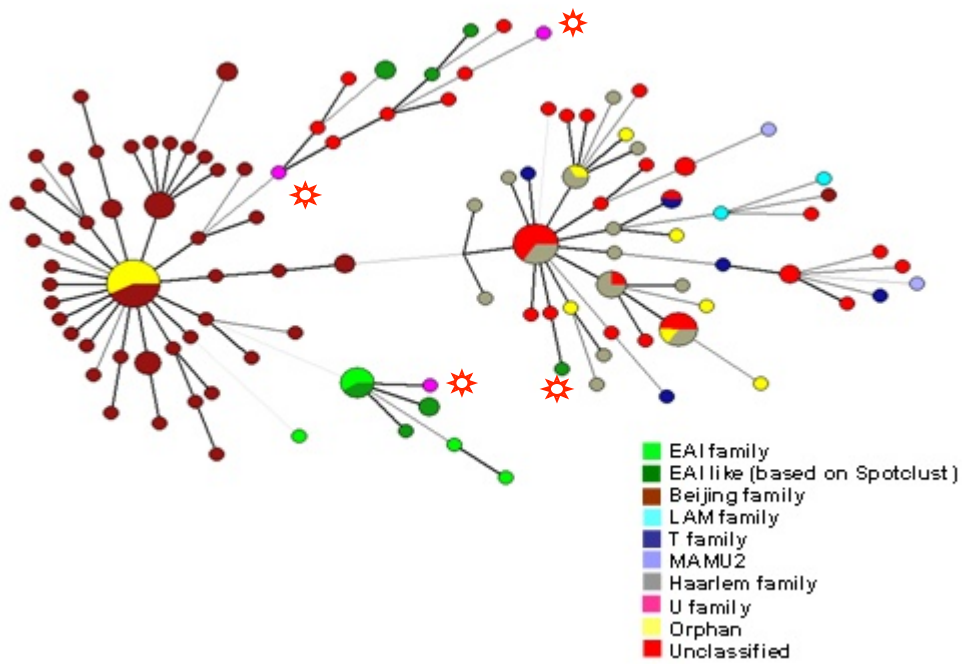



Supplementary Figure S3. New hypothetical subtype definition of the Euro-American lineage. Phylogenetic analysis of Euro-American strains using 4,419 whole-genome SNP markers. The phylogenetic tree was constructed based on Nei's distance using the PHYLIP software (neighbor-joining approach).

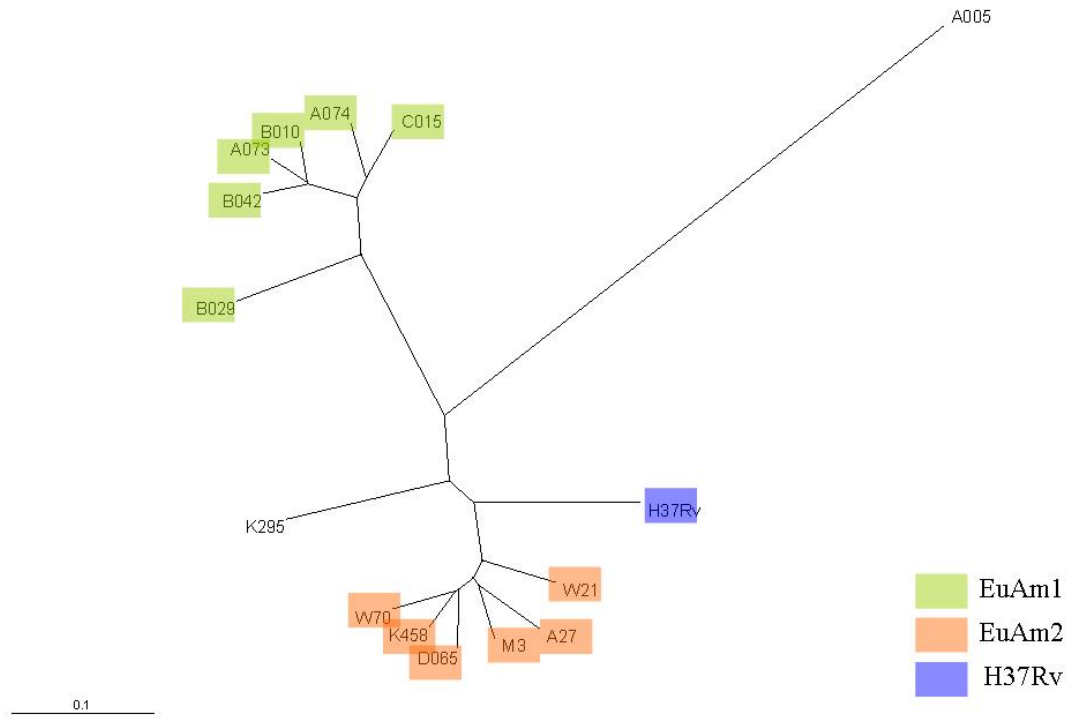

Supplement: 41598_2017_1580_MOESM1_ESM.pdf [file 41598_2017_1580_MOESM1_ESM.pdf]
